# Supplementary material for: Precise control of drug release from dually responsive poly(ether urethane) nanoparticles
Source: Royal Society of Chemistry journal article supplement (doi:10.1039/c3ra41410h), 2013-01-01
Supplement: c3ra41410h.pdf [file c3ra41410h.pdf]

## Supporting Information (SI)

### Precise control of drug release from dually responsive poly(ether urethane) nanoparticles

Yangyun Wang, Xiaomeng Li, Guolin Wu, Jiatong Chen, Yinong Wang and Jianbiao Ma

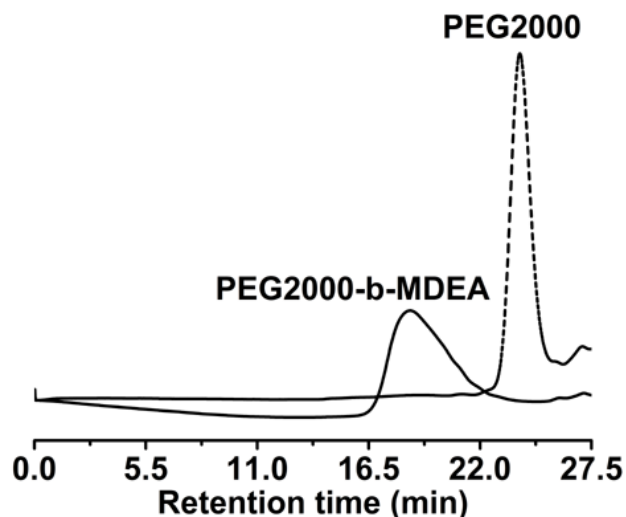

**Fig. S1.** GPC traces of the poly(ether urethane) PEG2000-b-MDEA and its PEG prepolymer PEG2000.

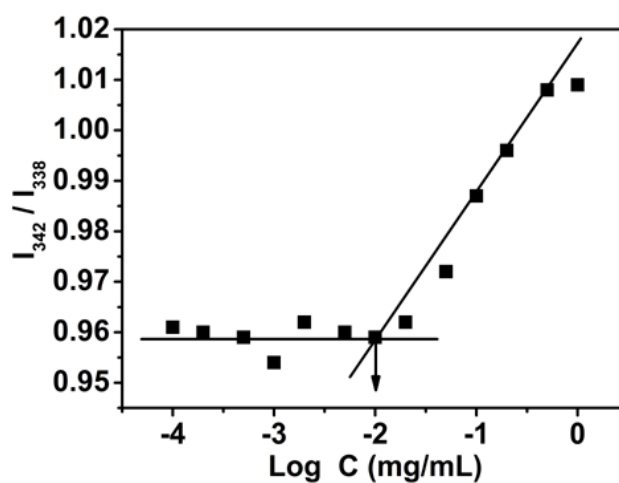

**Fig. S2.** Intensity ratio  $I_{342}/I_{338}$  obtained from the fluorescence excitation spectra of pyrene plotted versus PEG1000-b-MDEA concentration at 25 °C.

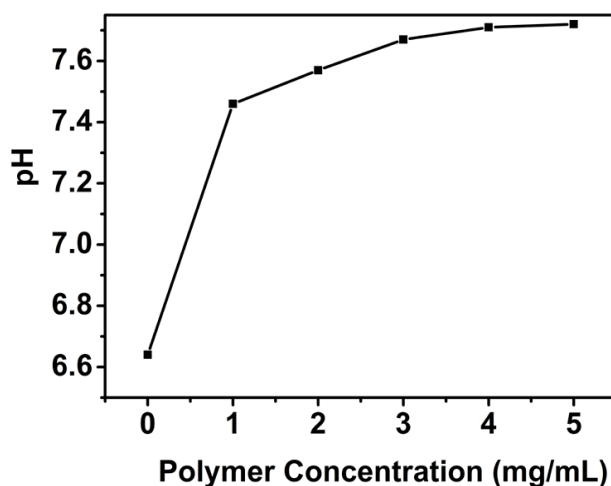

**Fig. S3.** pH value of the distilled water plotted versus PEG1000-b-MDEA concentration at 25 °C.

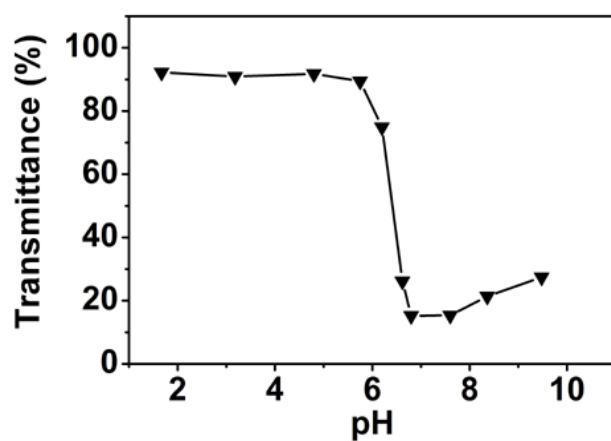

**Fig. S4.** pH dependence of the transmittance for the PEG600-b-MDEA aqueous solution under different pH condition. PEG600-b-MDEA concentration is 1 mg/mL.

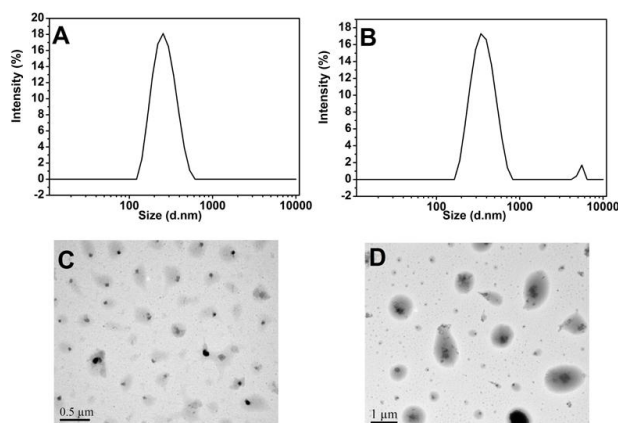

**Fig. S5.** (A) and (C) DLS and TEM images of blank PEG1000-b-MDEA nanoparticles. (B) and (D) DLS and TEM images of DOX-loaded PEG1000-b-MDEA nanoparticles.
